# Supplementary material for: The ecological half-life of radiocesium in surficial bottom sediments of five ponds in Fukushima based on in situ measurements with plastic scintillation fibers
Source: Royal Society of Chemistry journal article supplement (doi:10.1039/d0em00160k), 2020-01-01
Supplement: d0em00160k1.pdf [file d0em00160k1.pdf]

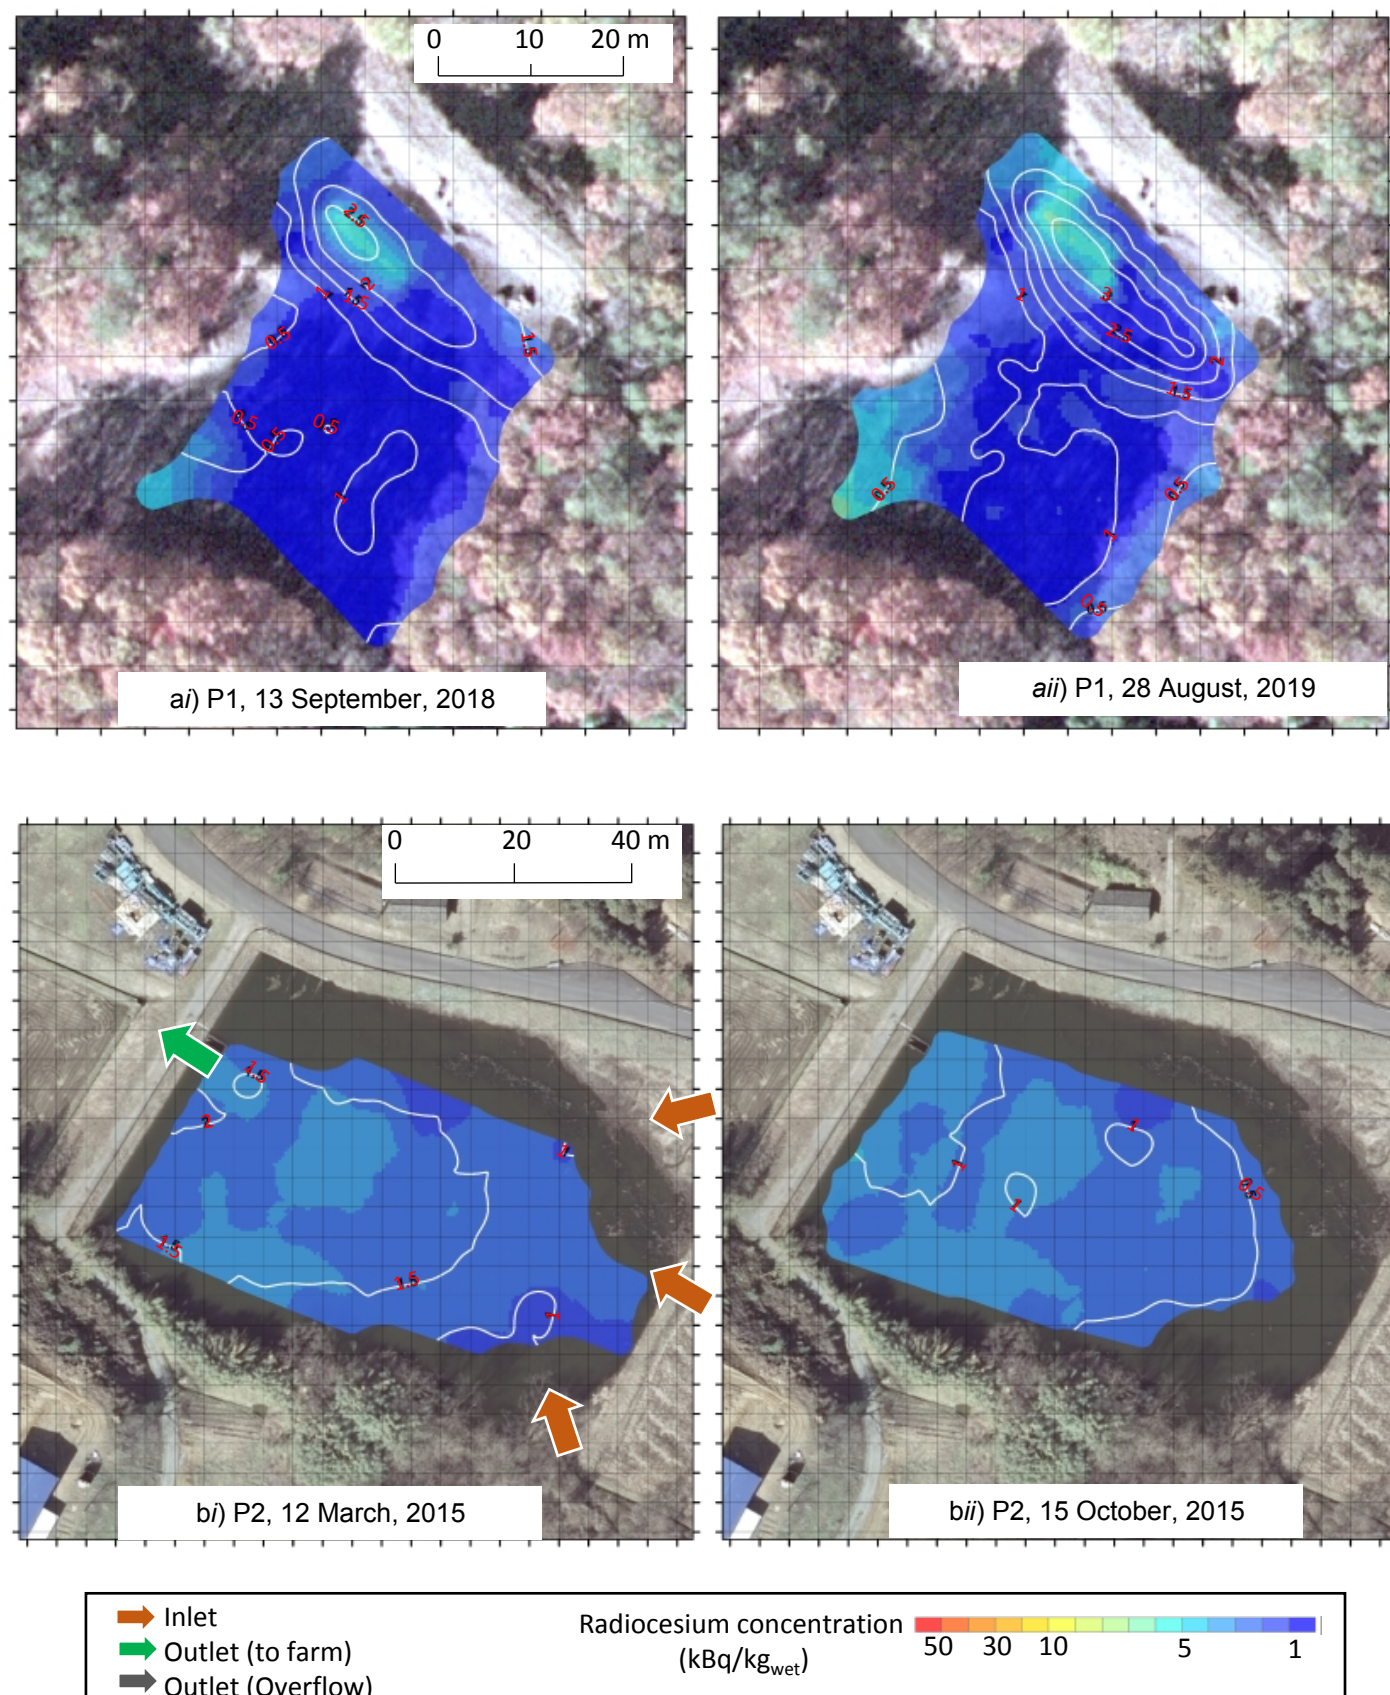



Figure S1: Radiation maps generated from PSF data. The maps depict concentrations at the measurement time. Satellite images © Arc GIS, ESRI, Co, Ltd., USA.

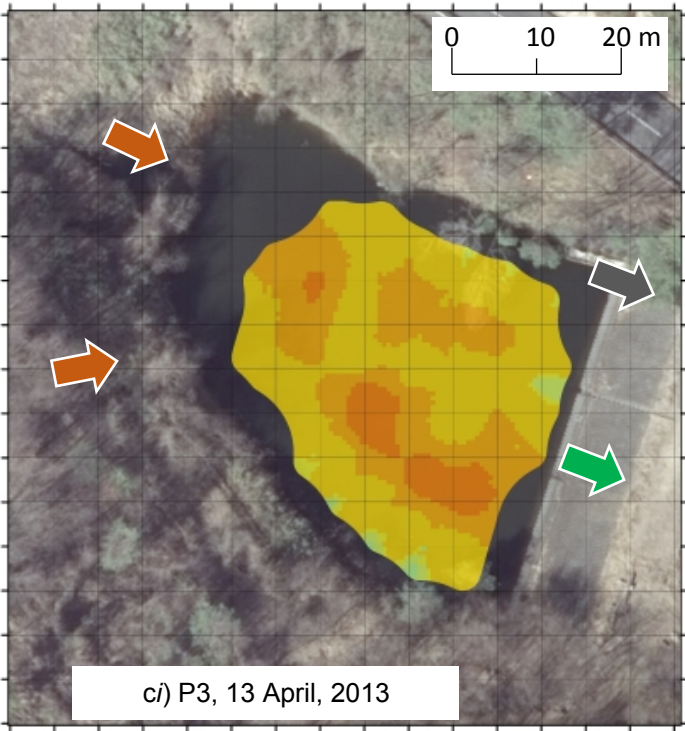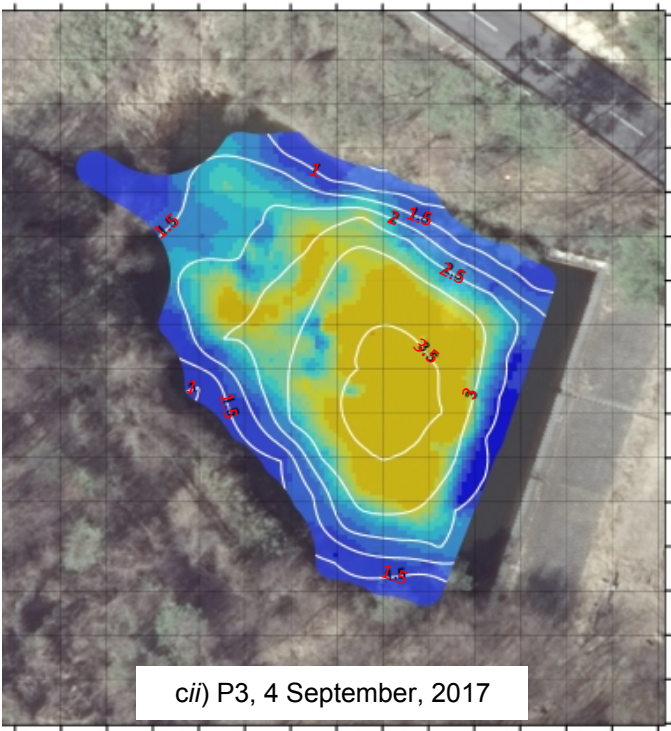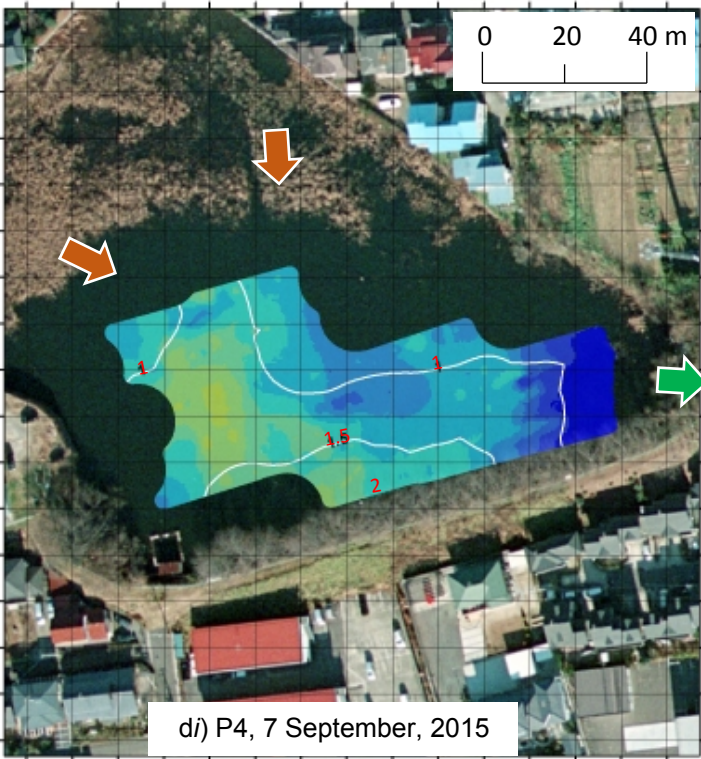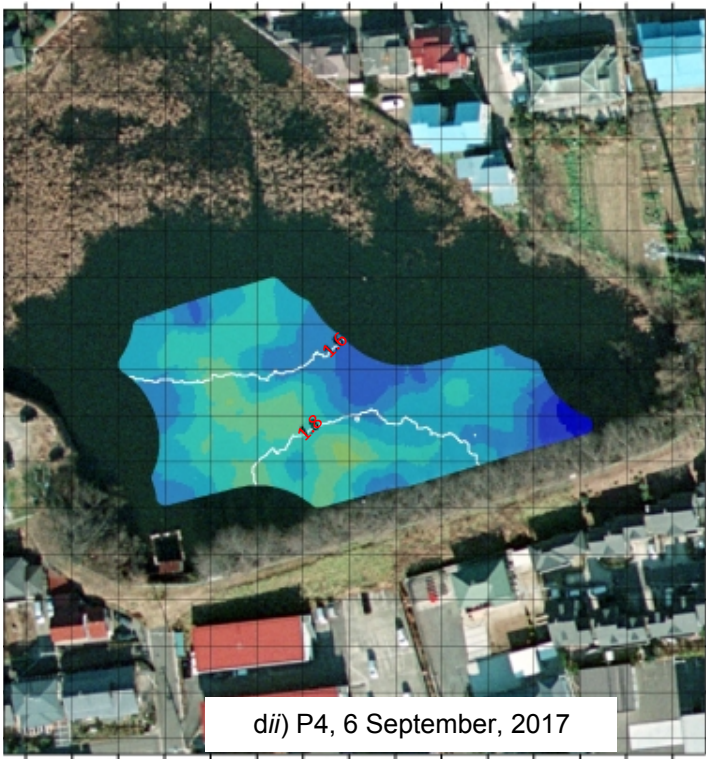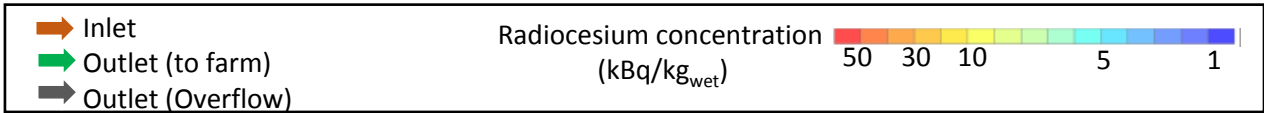



Figure S1: Radiation maps generated from PSF data. The maps depict concentrations at the measurement time. Satellite images © Arc GIS, ESRI, Co, Ltd., USA.

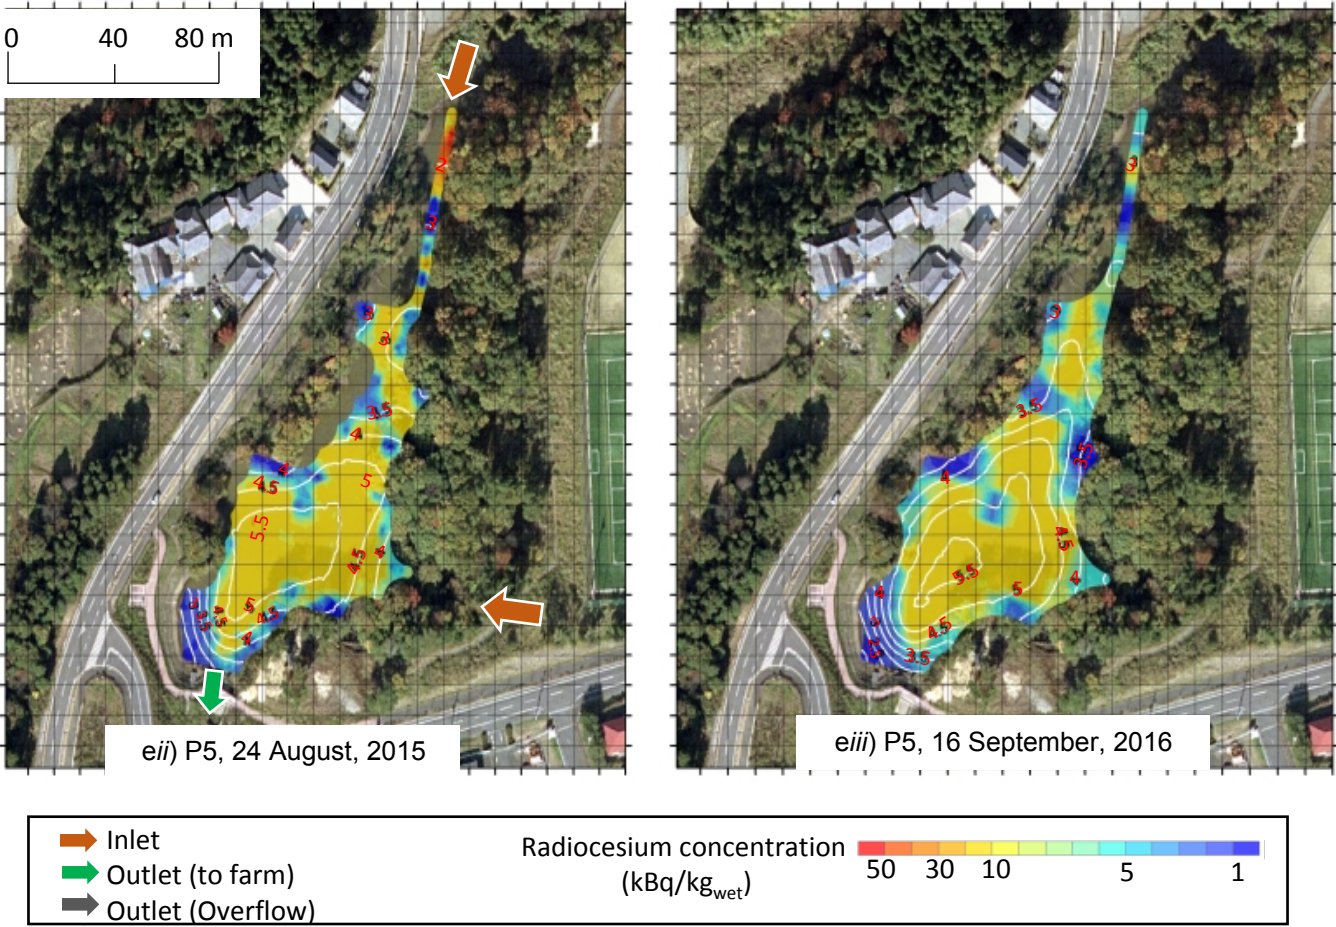

Figure S2: Distribution of depths containing 90% of <sup>137</sup>Cs concentration in sediments collected from the ponds during period.

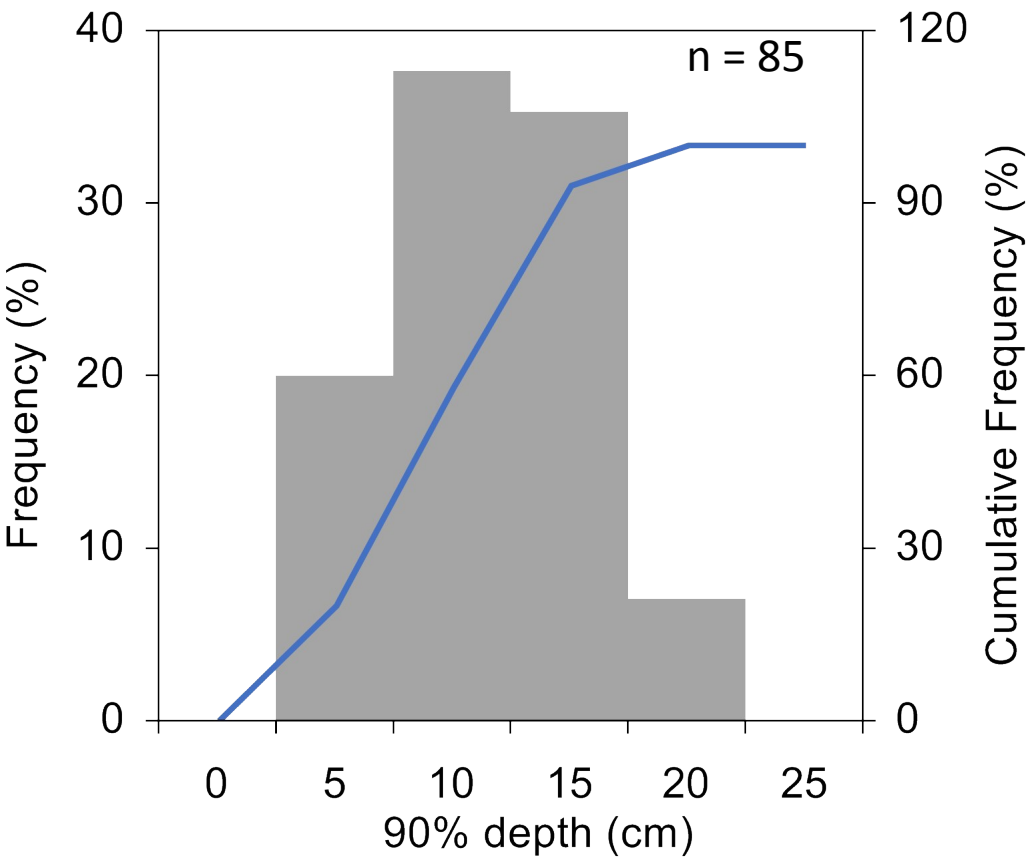

Geometric mean = 10.6 cm  
Arithmetic mean = 11.5 cm
